# Supplementary figures and images for: Two-signal requirement for growth-promoting function of Yap in hepatocytes
Source: eLife journal article supplement (doi:10.7554/elife.02948), 2015-02-10

Figure 2 - figure supplement 4

A)

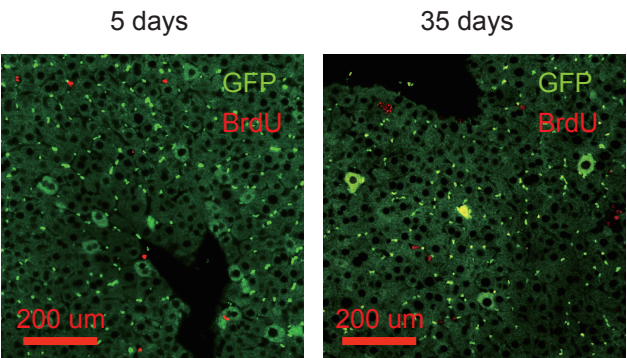

B)

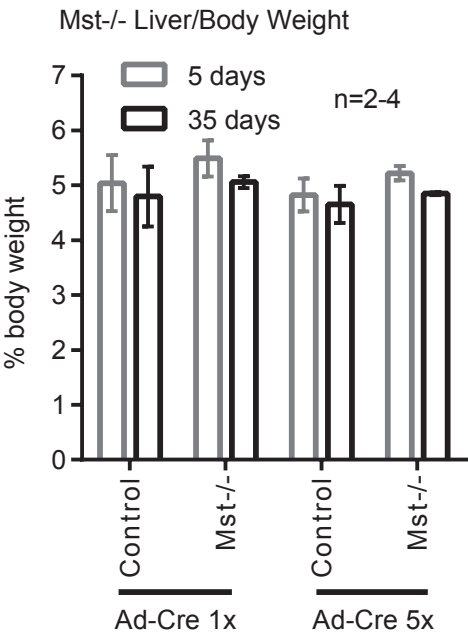

C)

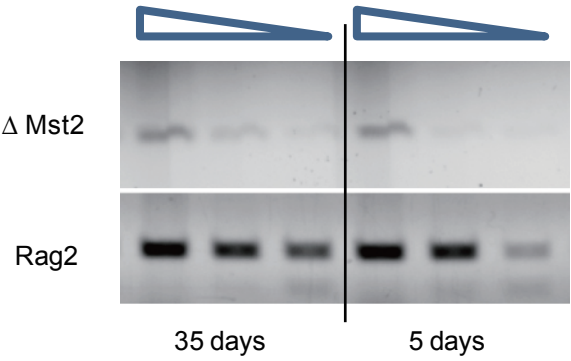

Supplement: supp [file elife-02948-supp-v1.zip]

Figure 4 - figure supplement 4

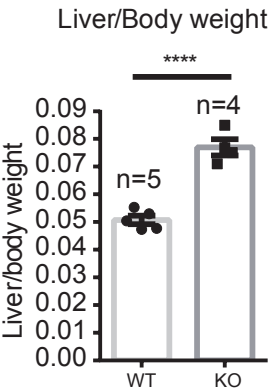

Supplement: supp [file elife-02948-supp-v1.zip]

Figure 5 - figure supplement 2

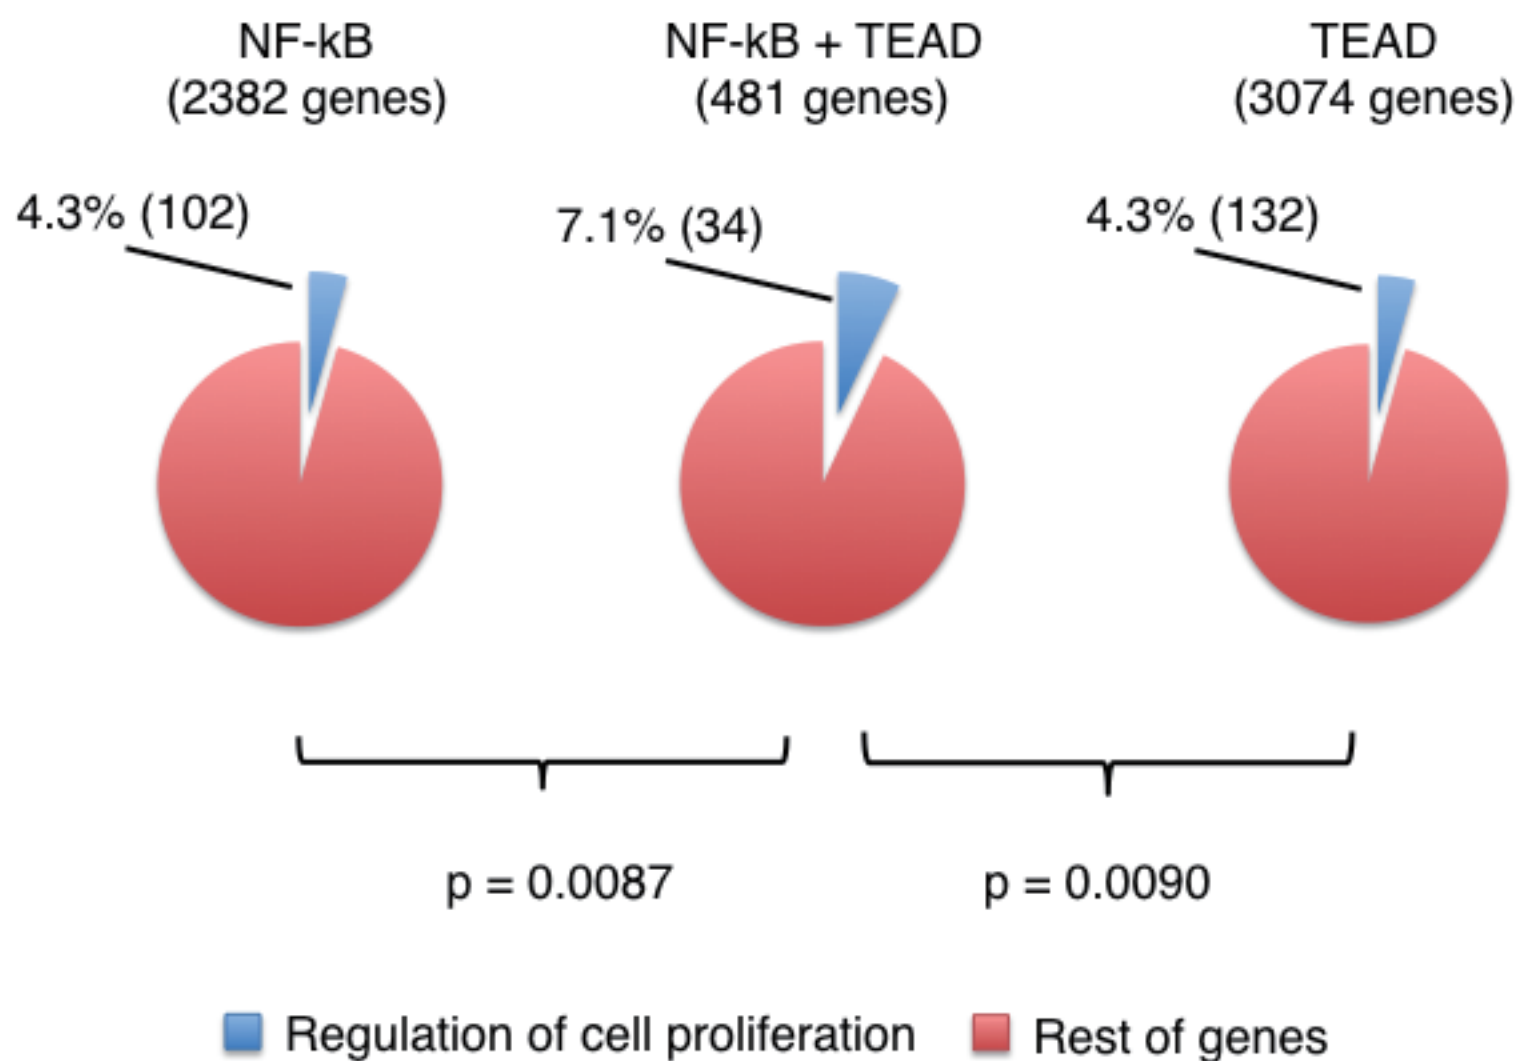

Supplement: supp [file elife-02948-supp-v1.zip]

Figure 1 - figure supplement 4

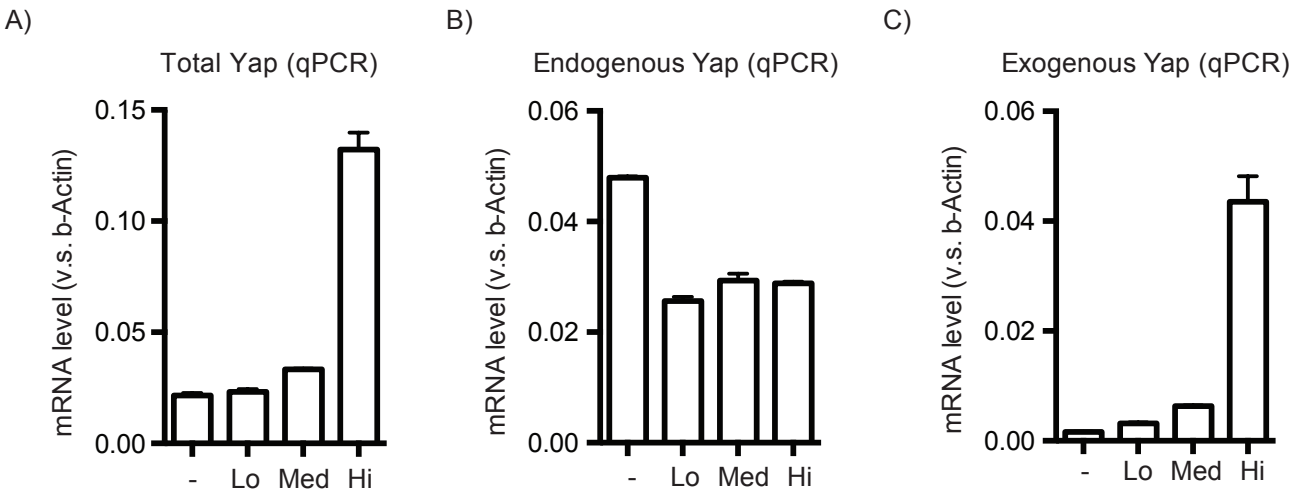

Supplement: supp [file elife-02948-supp-v1.zip]

Figure 5 - figure supplement 1

A)

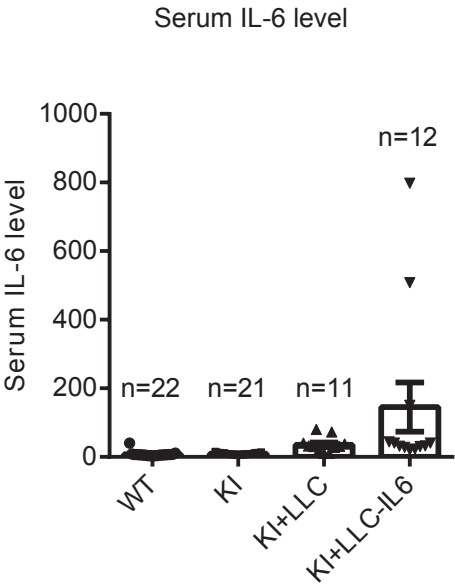

B)

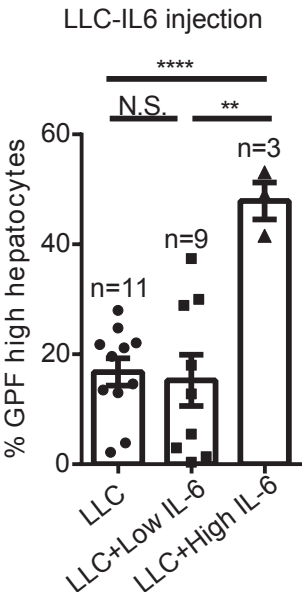

Supplement: supp [file elife-02948-supp-v1.zip]

Figure 4 - figure supplement 2

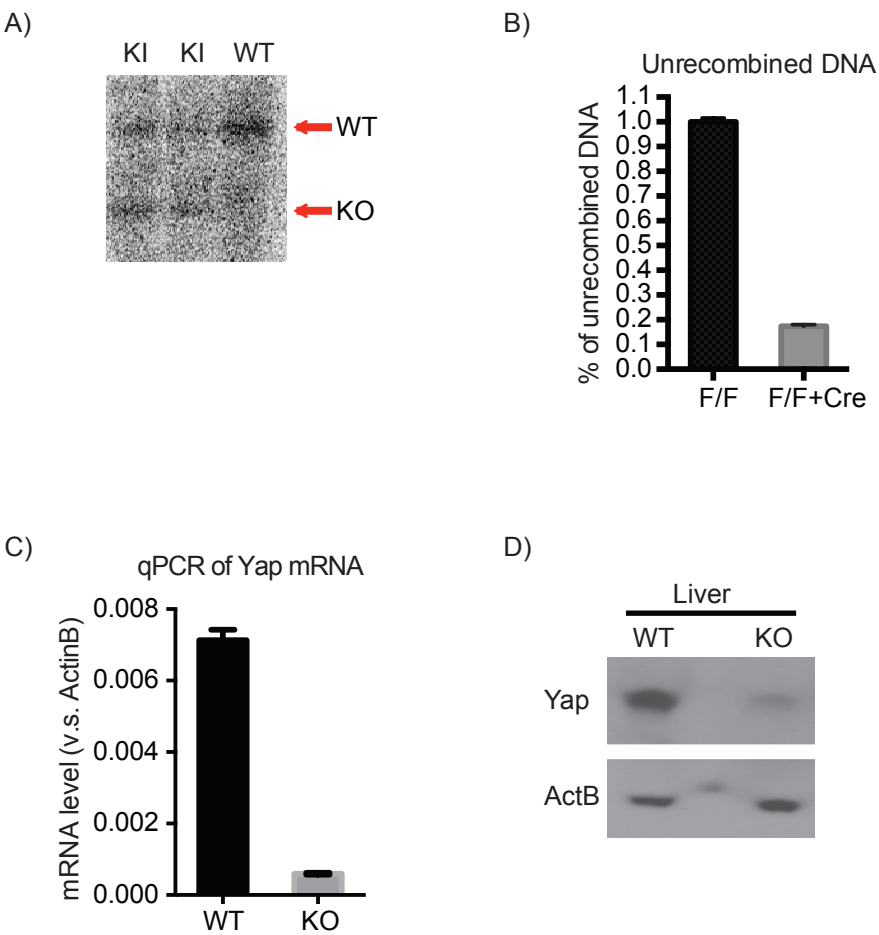

Supplement: supp [file elife-02948-supp-v1.zip]

Figure 1 - figure supplement 2

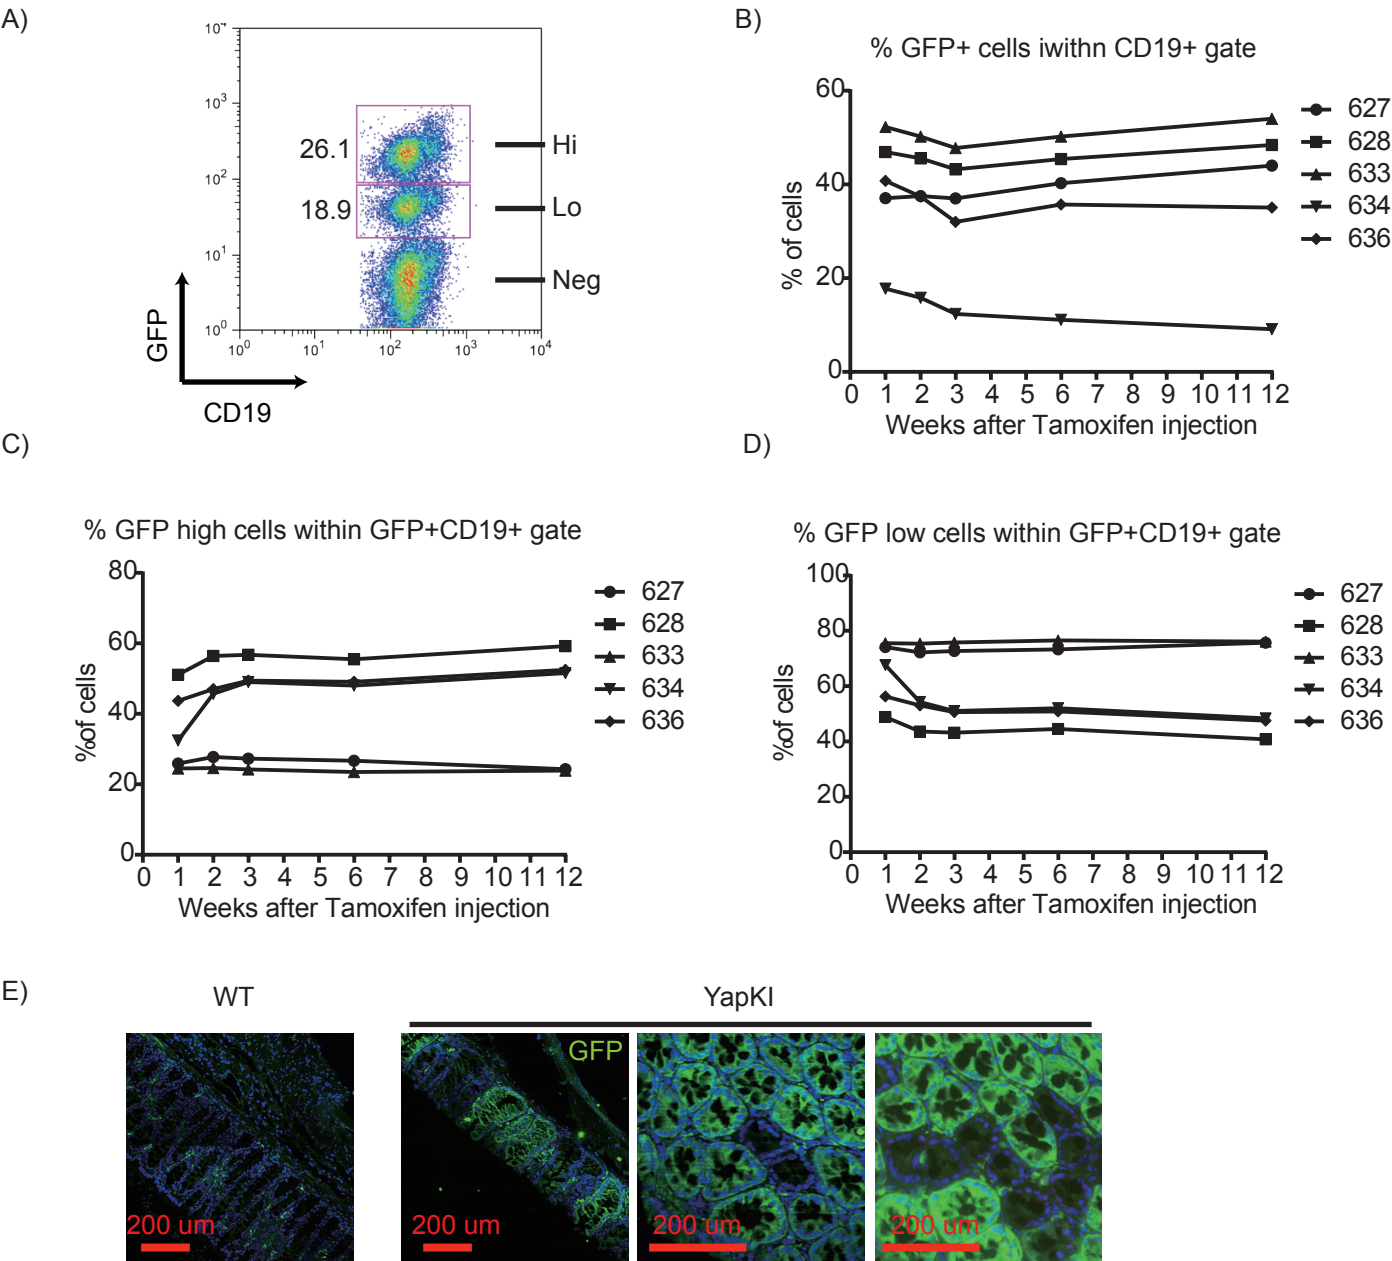

Supplement: supp [file elife-02948-supp-v1.zip]

Figure 3 - figure supplement 5

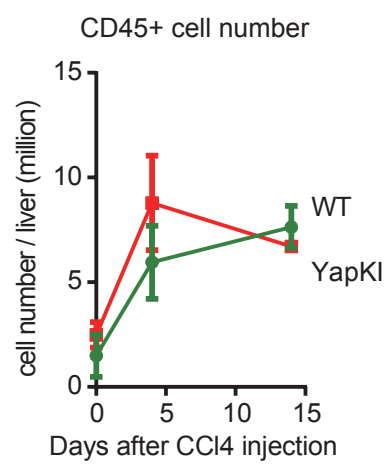

Supplement: supp [file elife-02948-supp-v1.zip]

Figure 4 - figure supplement 1

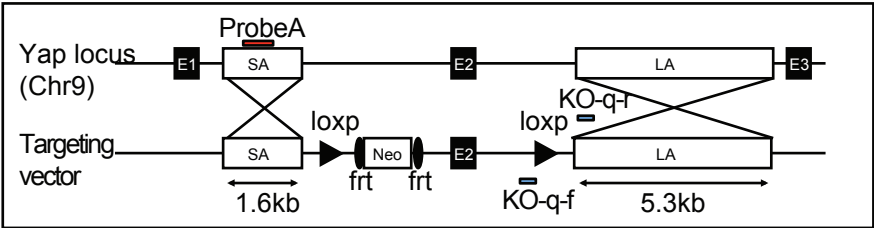

Supplement: supp [file elife-02948-supp-v1.zip]

Figure 1 - figure supplement 1

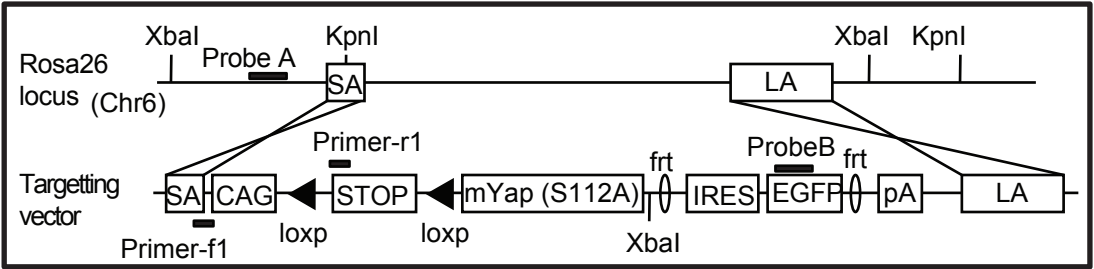

Supplement: supp [file elife-02948-supp-v1.zip]

Figure 1 - figure supplement 3

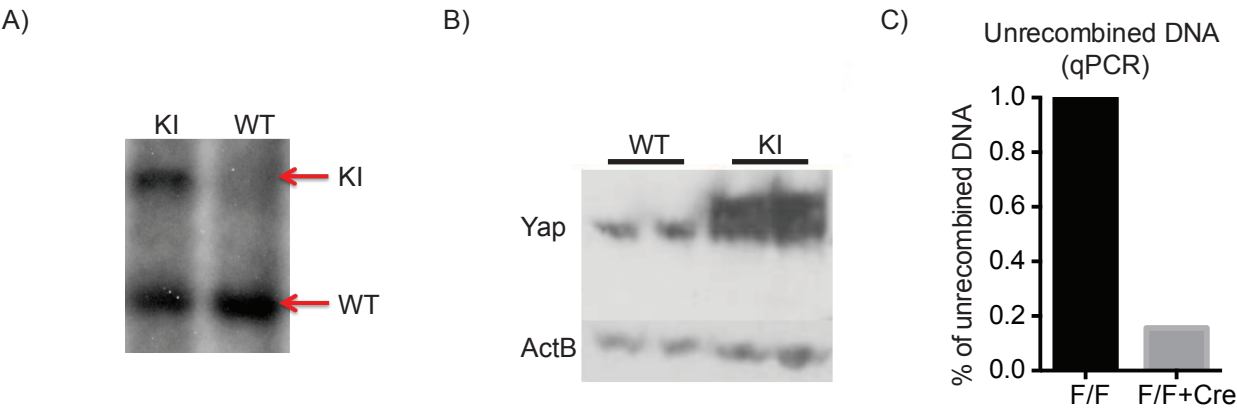

Supplement: supp [file elife-02948-supp-v1.zip]

Figure 3 - figure supplement 3

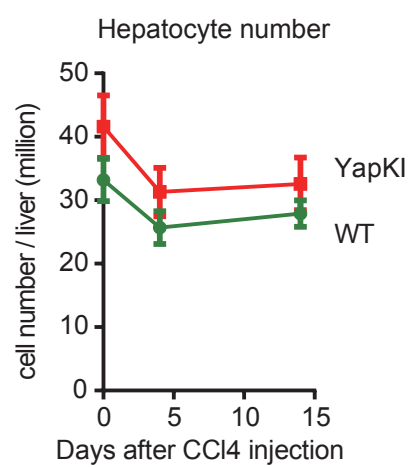

Supplement: supp [file elife-02948-supp-v1.zip]

Figure 3 - figure supplement 2

A)

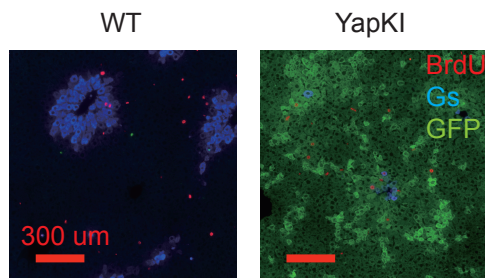

Supplement: supp [file elife-02948-supp-v1.zip]

Figure 3 - figure supplement 4

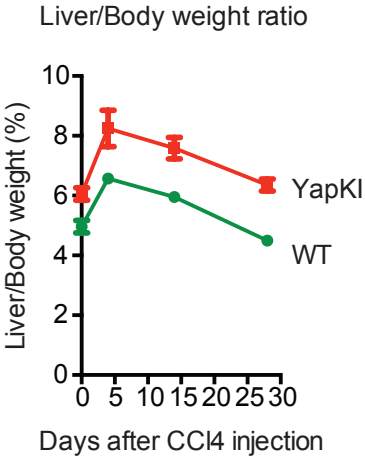

Supplement: supp [file elife-02948-supp-v1.zip]

Figure 3 - figure supplement 1

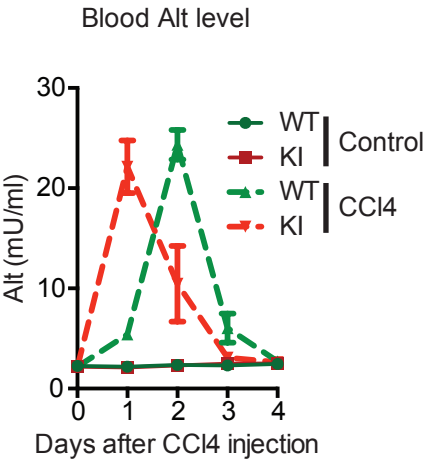

Supplement: supp [file elife-02948-supp-v1.zip]

Figure 2 - figure supplement 1

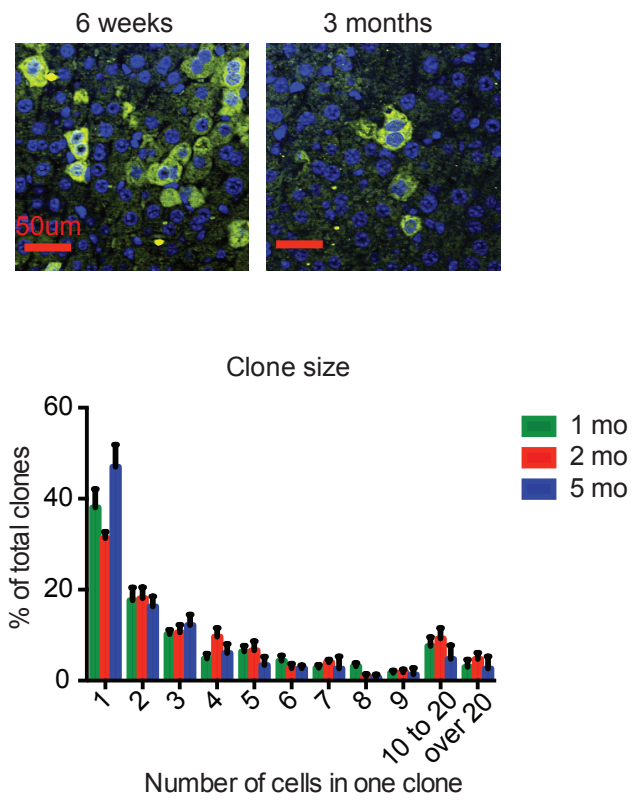

Supplement: supp [file elife-02948-supp-v1.zip]

Figure 4 - figure supplement 3

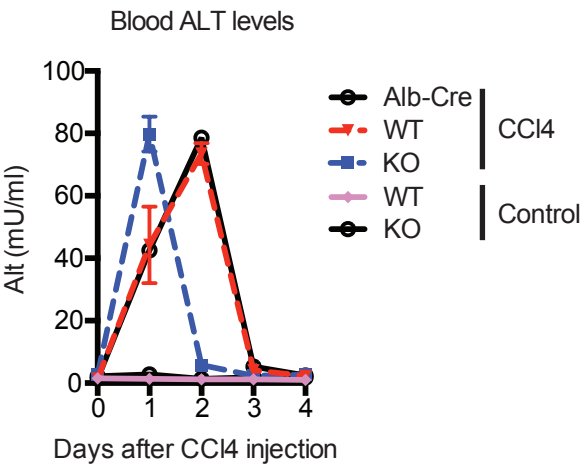

Supplement: supp [file elife-02948-supp-v1.zip]

Figure 4 - figure supplement 5

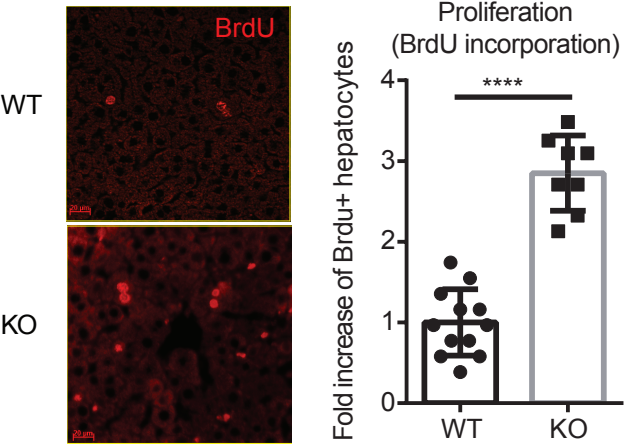

Supplement: supp [file elife-02948-supp-v1.zip]

Figure 6 - figure supplement 1

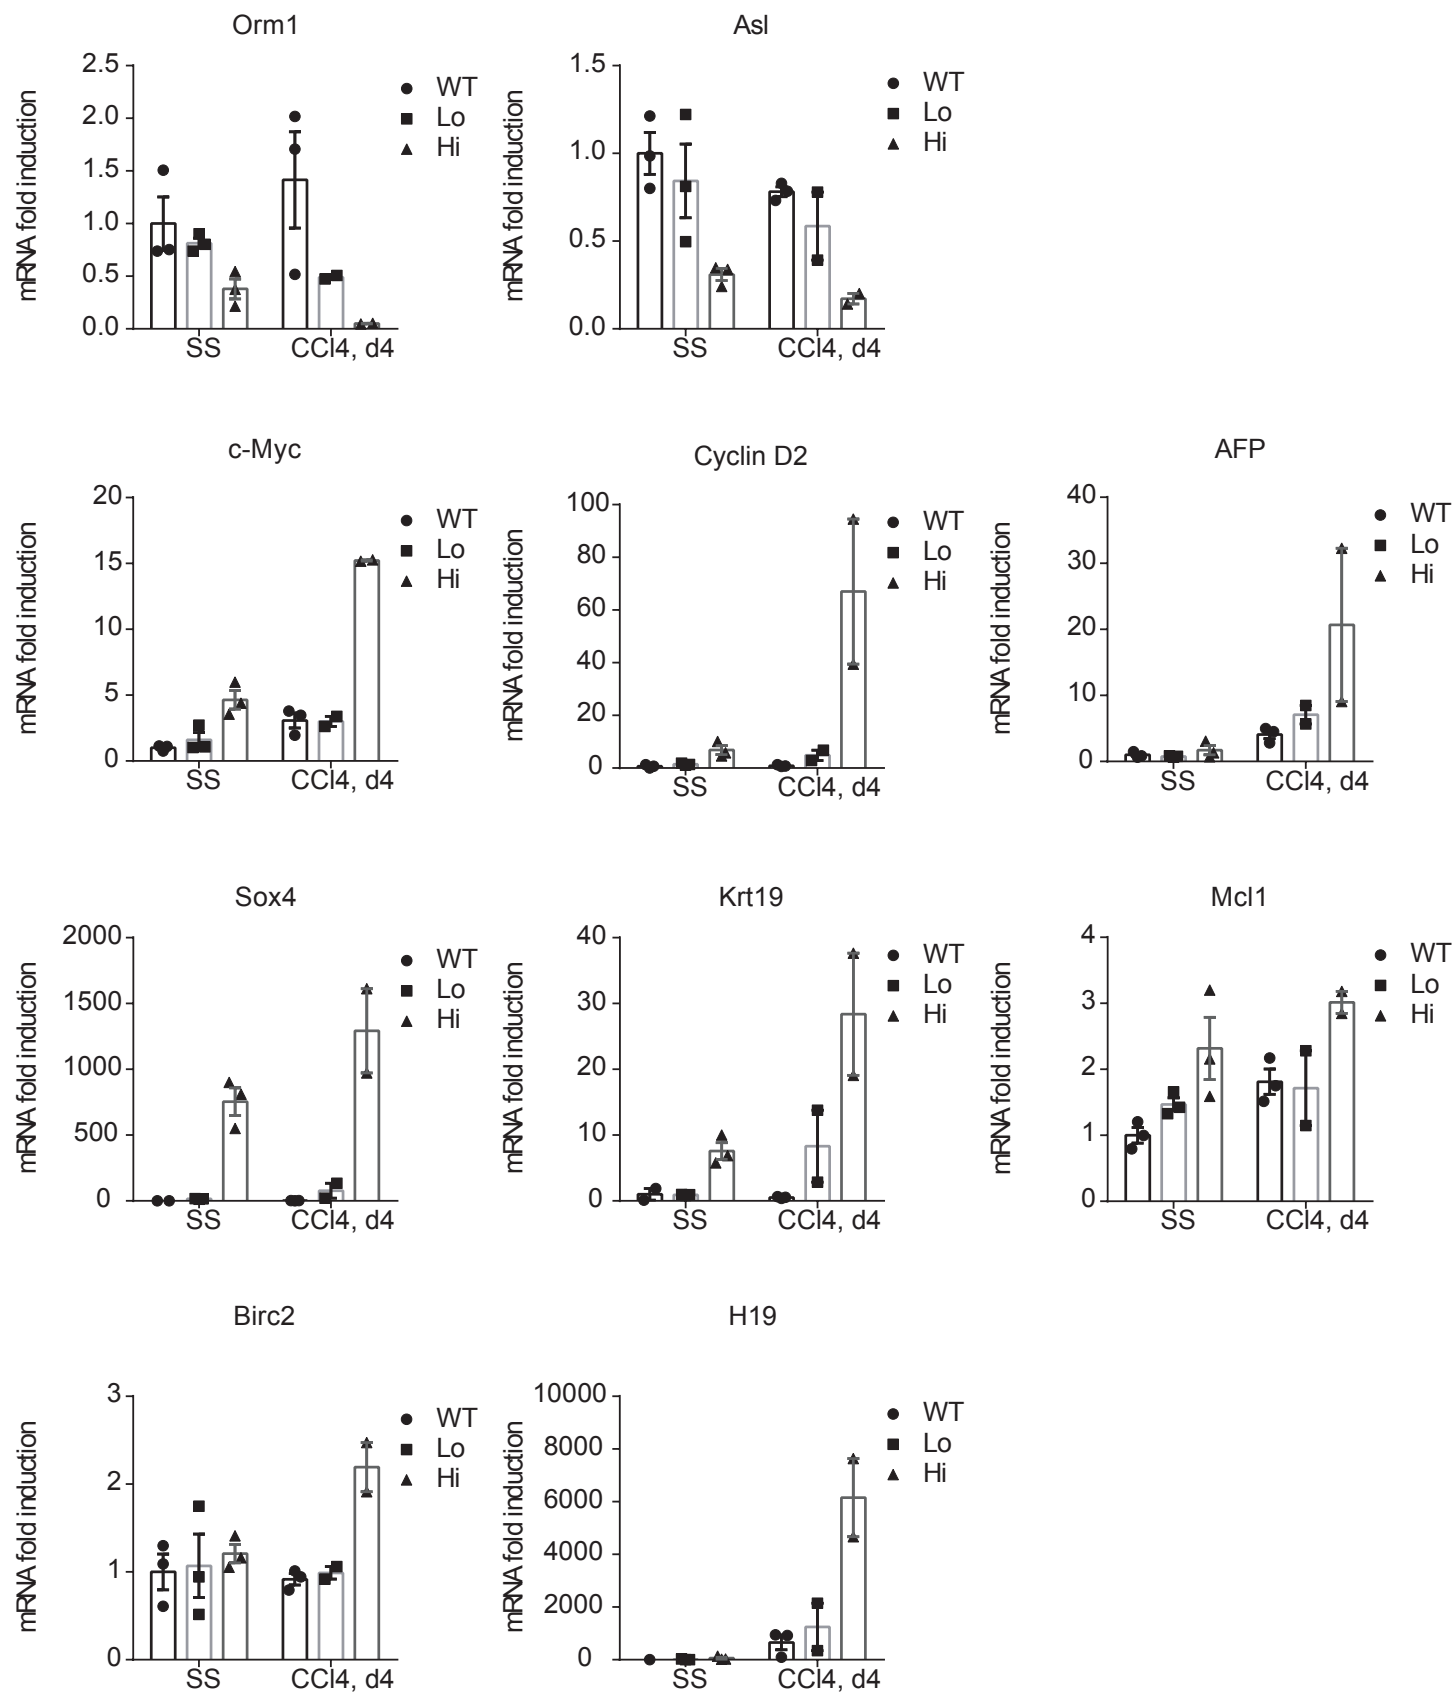

Supplement: supp [file elife-02948-supp-v1.zip]

Figure 2 - figure supplement 3

A)

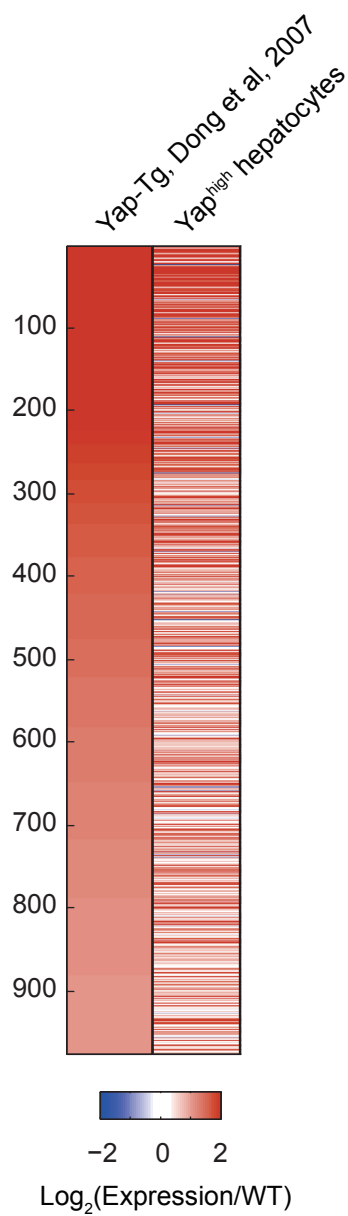

B)

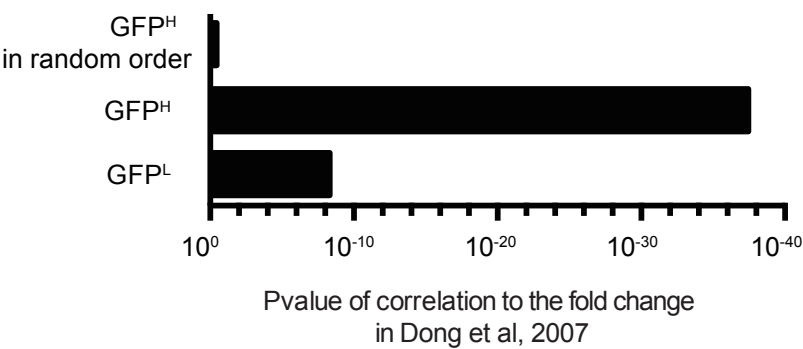

Supplement: supp [file elife-02948-supp-v1.zip]

Figure 2 - figure supplement 2

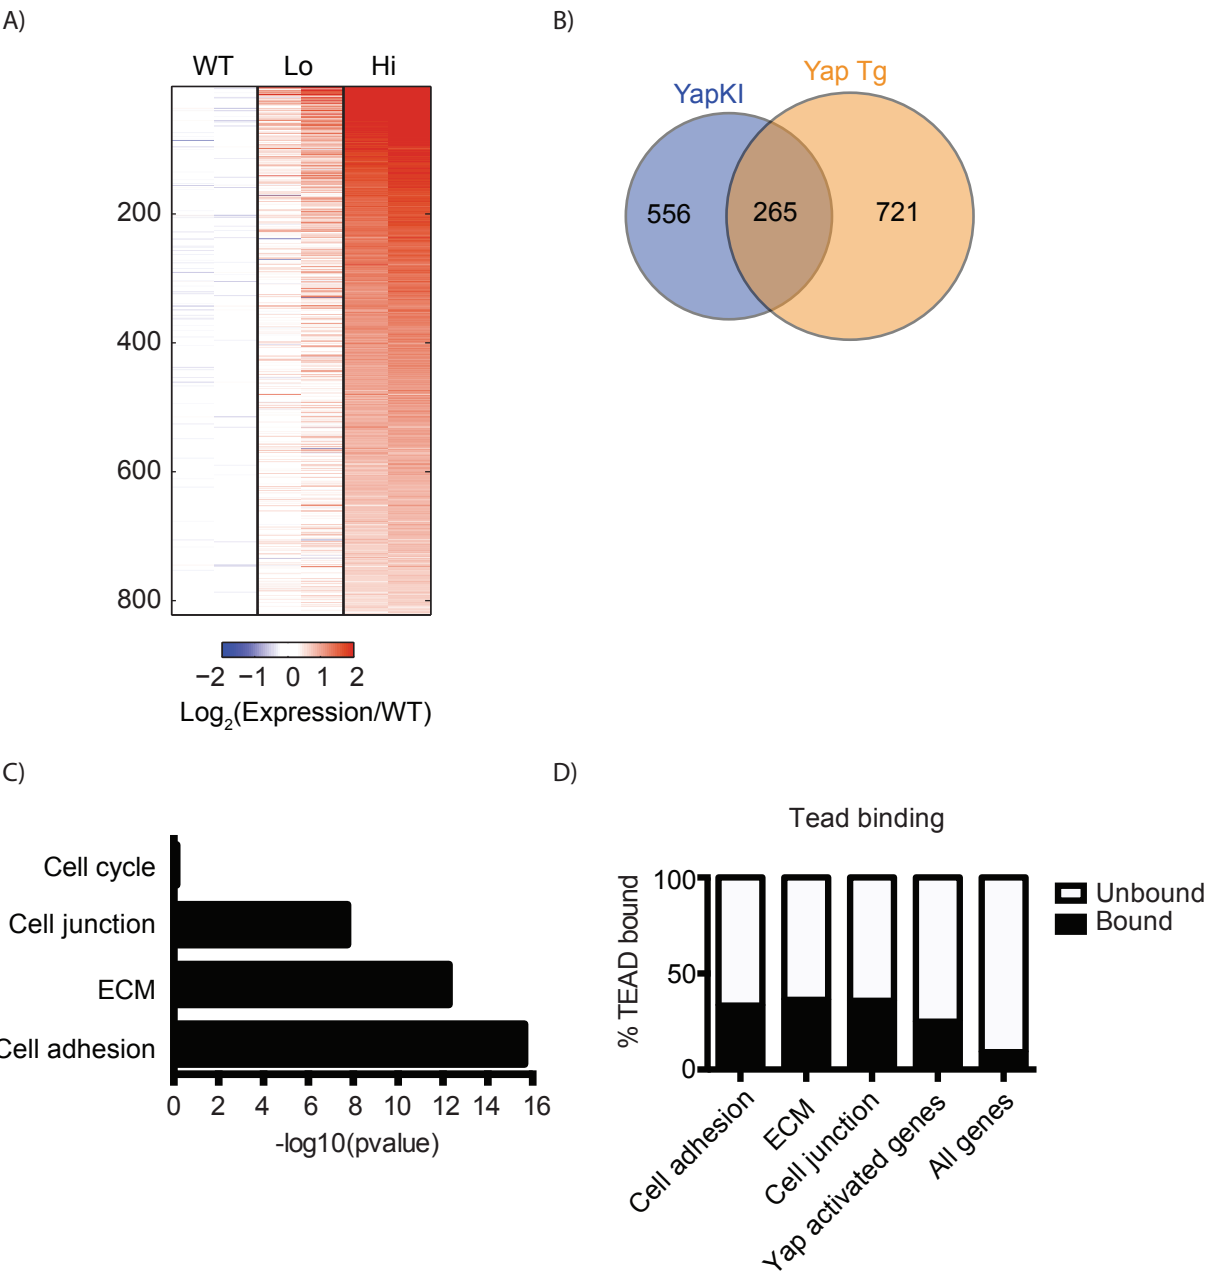

Supplement: supp [file elife-02948-supp-v1.zip]
